# Supplementary material for: Stability of Octadecyltrimethoxysilane-Based Coatings on Aluminum Alloy Surface
Source: MDPI journal article supplement (doi:10.3390/ma15051804), 2022-02-28
Supplement: s1 [file s1]

# Stability of Octadecyltrimethoxysilane- Based Coatings on Aluminum Alloy Surface

Alexey Y. Zhizhchenko <sup>1,2</sup>, Anastasiia V. Shabalina <sup>3</sup>, Ali A. Aljulaih <sup>4,5</sup>, Stanislav O. Gurbatov <sup>1,2</sup>, Aleksandr A. Kuchmizhak <sup>1,2</sup>, Satoru Iwamori <sup>4</sup> and Sergei A. Kulinich <sup>1,4,\*</sup>

Table S1. Elemental composition of alloy AA24.(from: ASM Aerospace Specifications Metals Inc.).

| Element  | Cu       | Mg       | Fe    | Mn       | Si    | Cr    | Zn     | Ti     | Others | Al          |
|----------|----------|----------|-------|----------|-------|-------|--------|--------|--------|-------------|
| Weight % | 3.8- 4.9 | 1.2- 1.8 | < 0.5 | 0.3- 0.9 | < 0.5 | < 0.1 | < 0.25 | < 0.15 | < 0.15 | 90.7 – 94.7 |

Table S2. Surface roughness of samples 1-3 evaluated by surface profiler

| Sample              | 1       | 2       | 3       |
|---------------------|---------|---------|---------|
| R <sub>a</sub> (nm) | 310 ±15 | 351 ±19 | 342 ±20 |
| RMS (nm)            | 321 ±21 | 355 ±25 | 349 ±28 |
